# Supplementary material for: The high expression of MTH1 and NUDT5 predict a poor survival and are associated with malignancy of esophageal squamous cell carcinoma
Source: PubMed Central journal article supplement (PMC7258951; doi:10.7717/peerj.9195), 2020-05-26

**Figure 1 A-H**

**(A)**

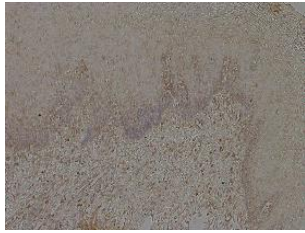

**(B)**

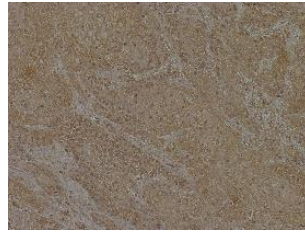

**(C)**

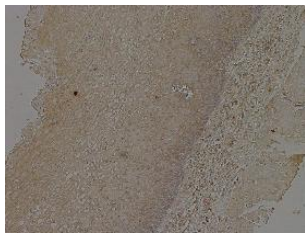

**(D)**

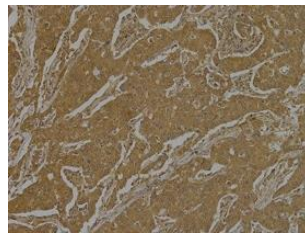

**(E)**

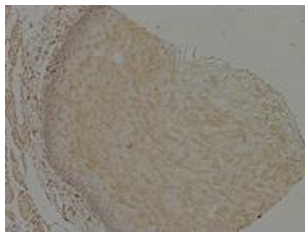

**(F)**

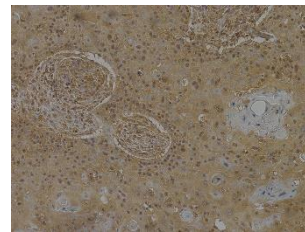

**(G)**

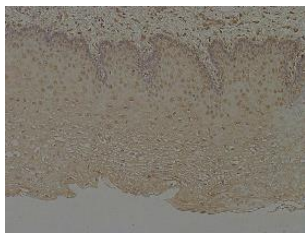

**(H)**

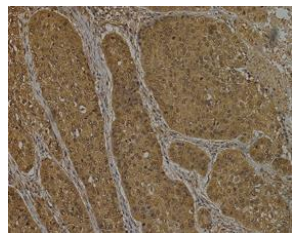

**Figure 2A**

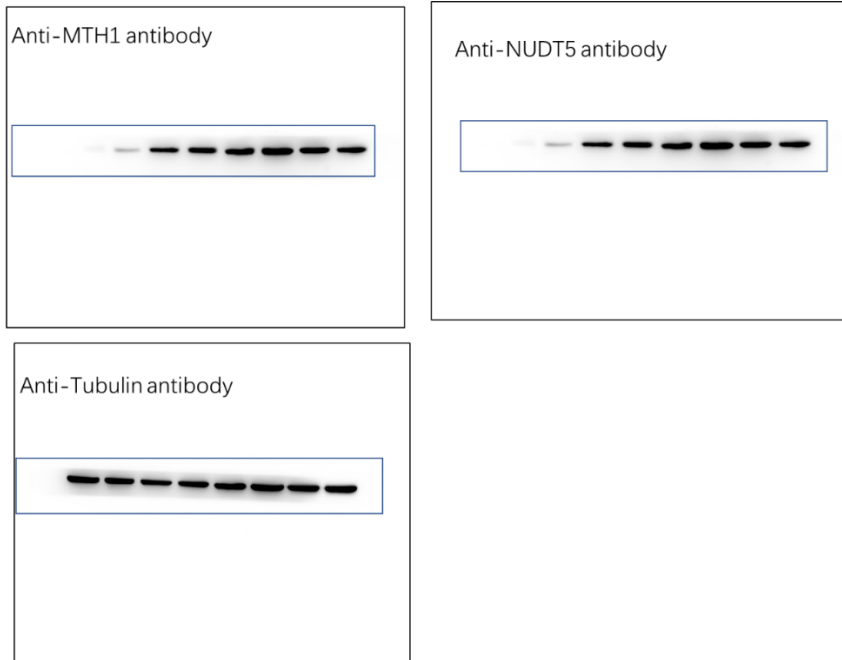

**Figure 2D**

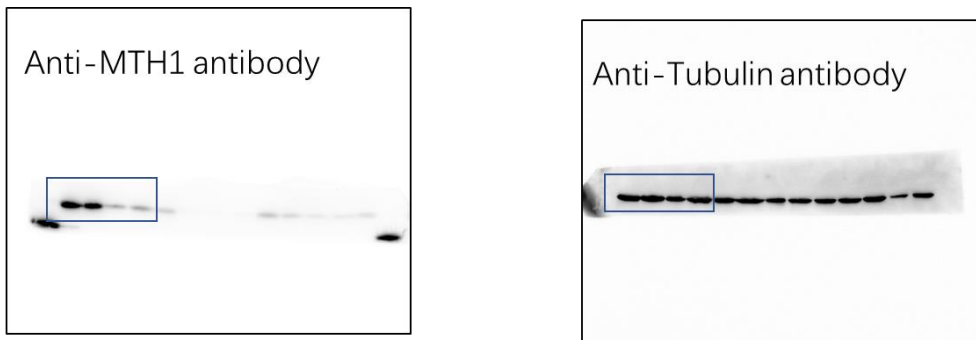

**Figure 2E**

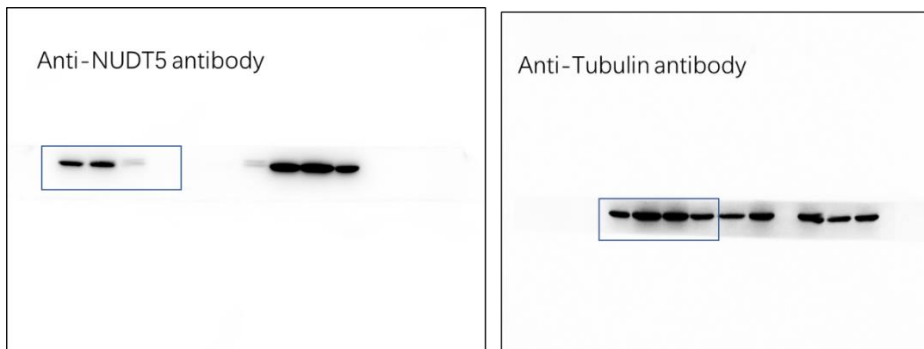

**Figure 3M**

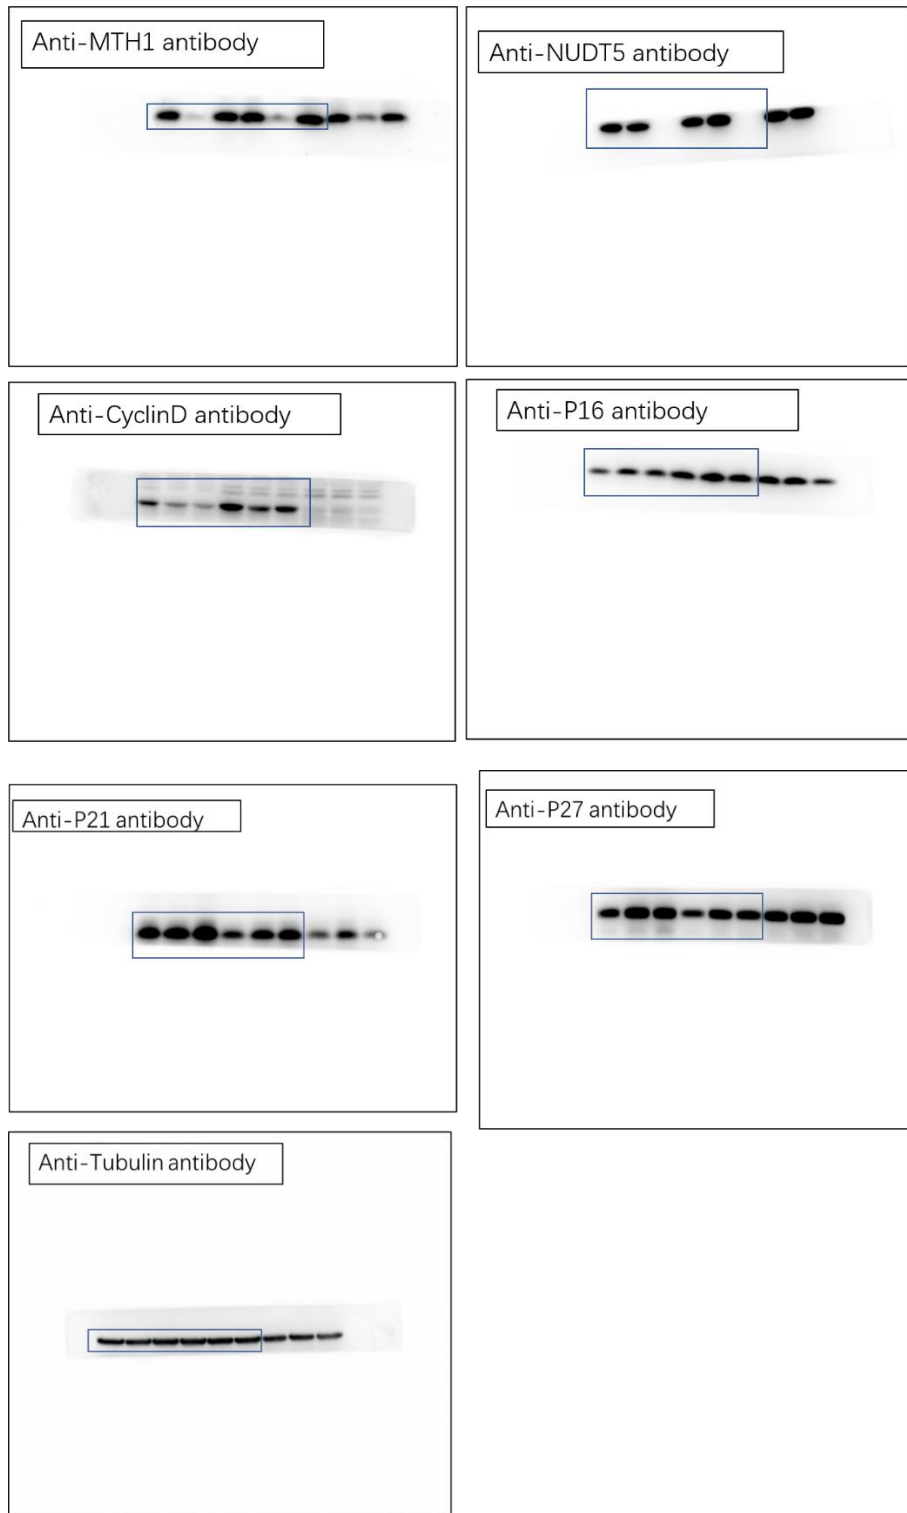

# Figure 4Q

## Repeat 1

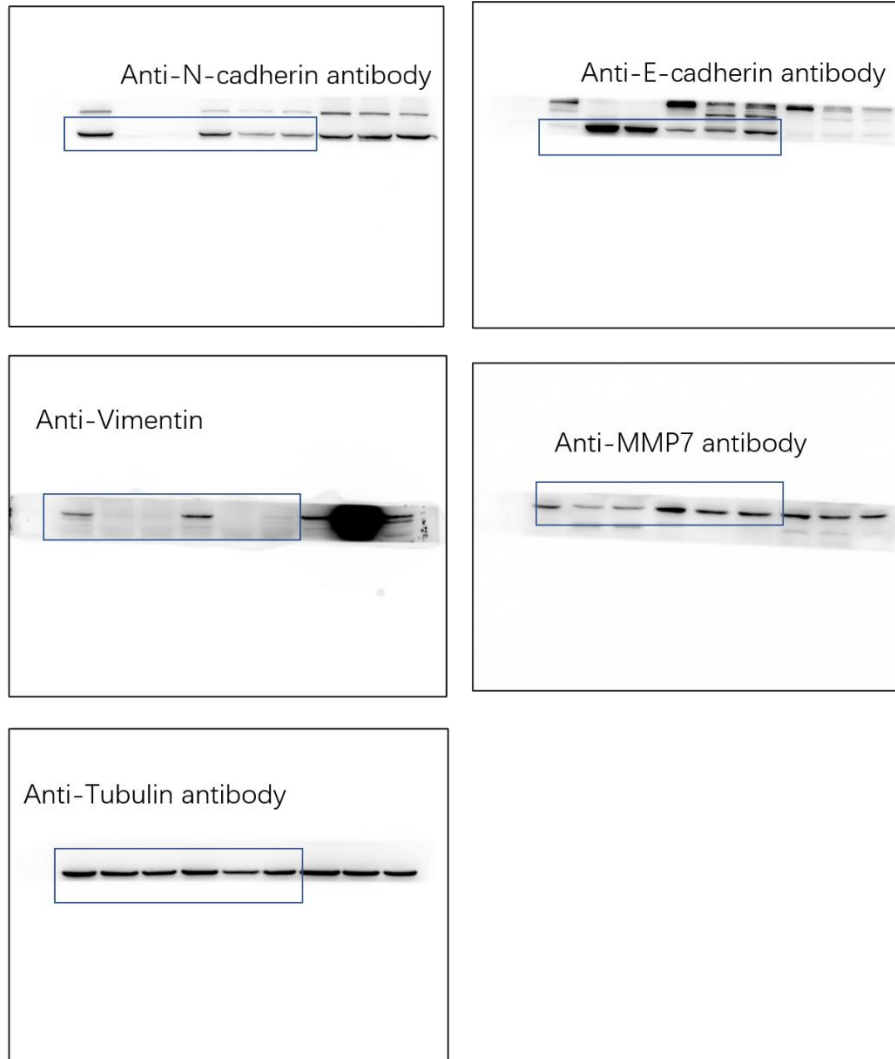

**Repeat 2**

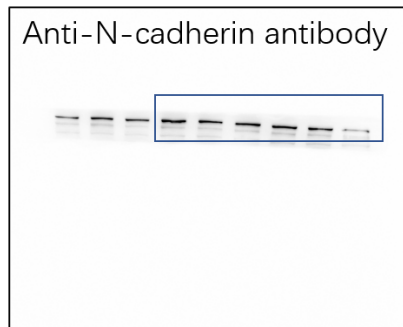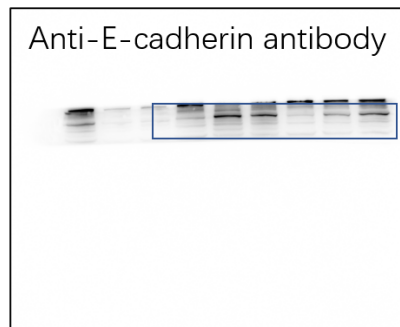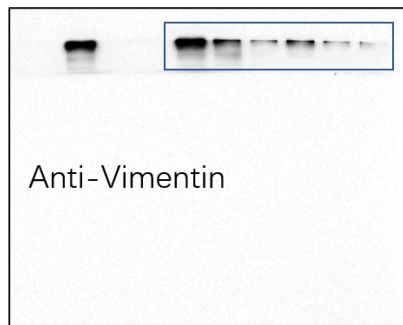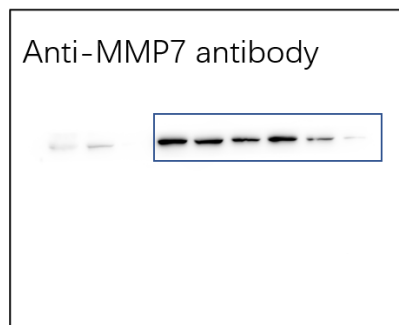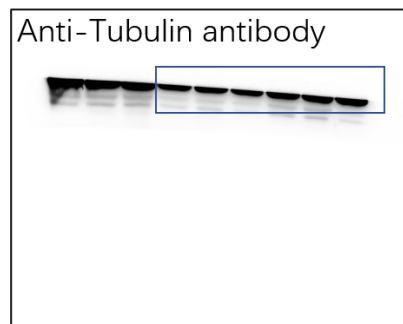

### Repeat 3

Anti-N-cadherin antibody

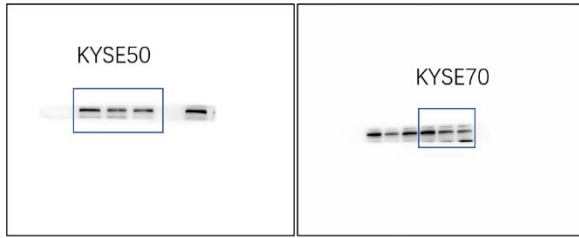

Anti-E-cadherin antibody

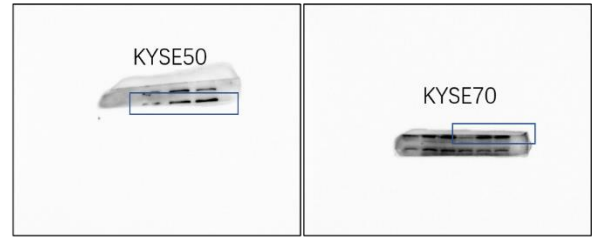

Anti-Vimentin

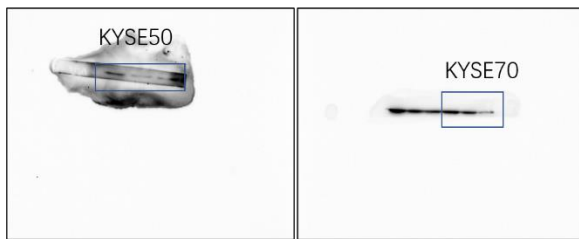

Anti-MMP7 antibody

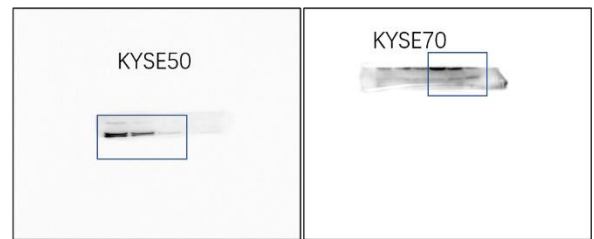

Anti-Tubulin antibody

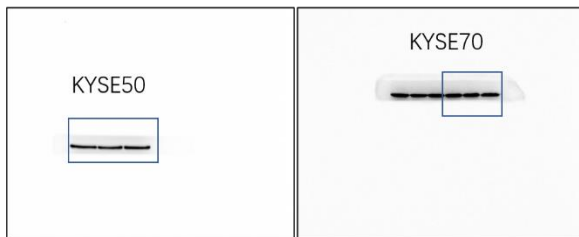

# Figure 4R

## Repeat 1

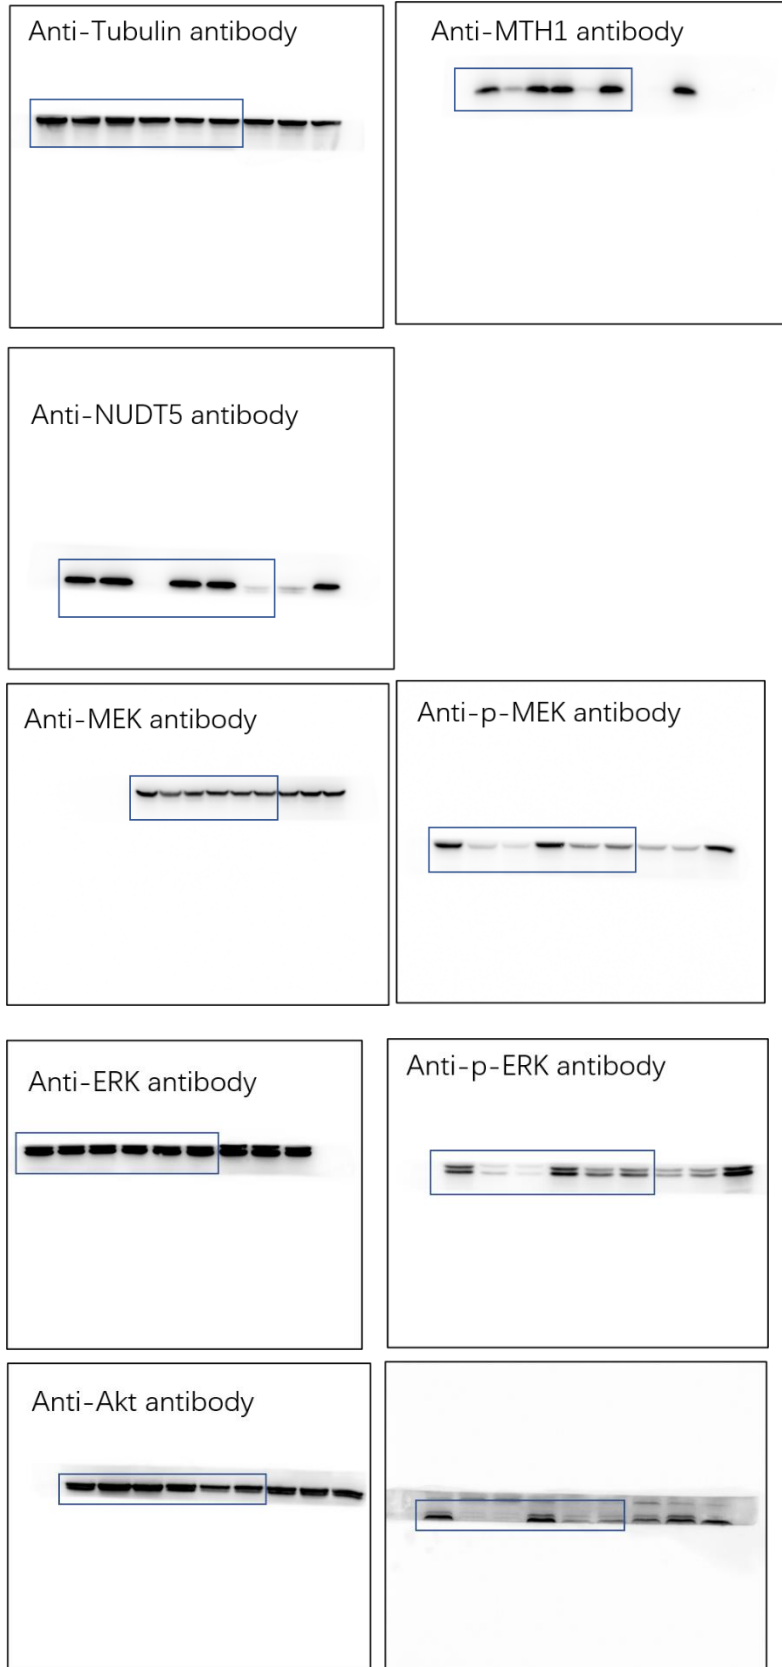

## Repeat 2

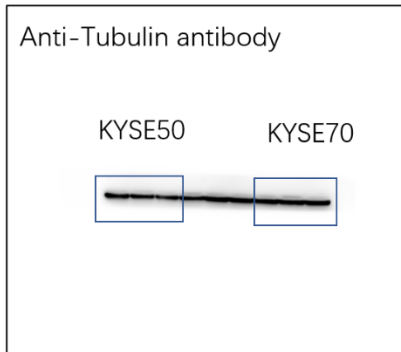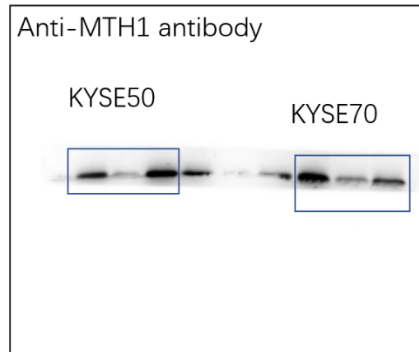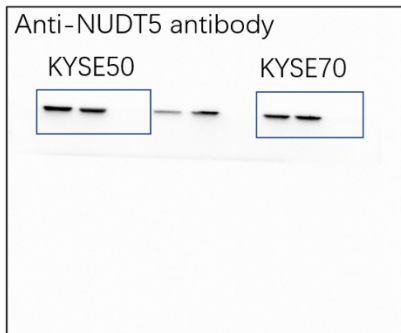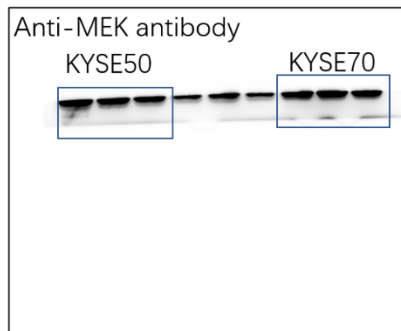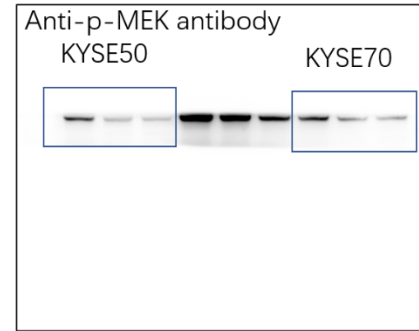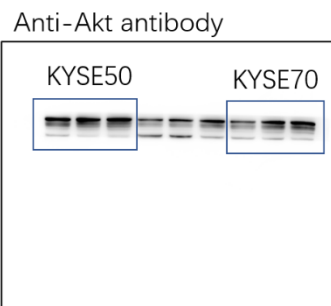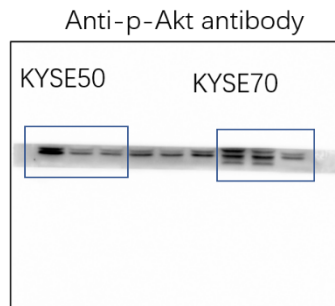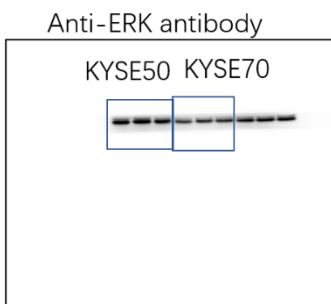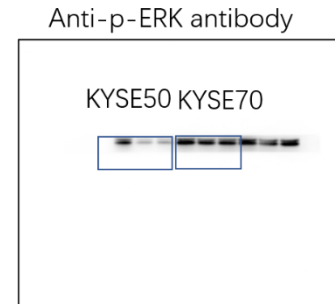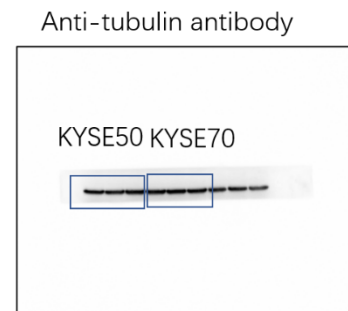



### Repeat 3

Anti-Tubulin antibody

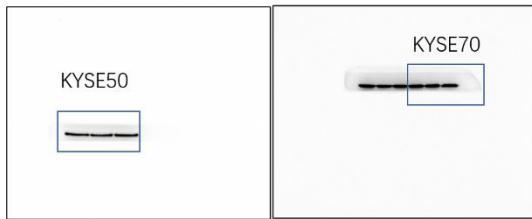

Anti-MTH1 antibody

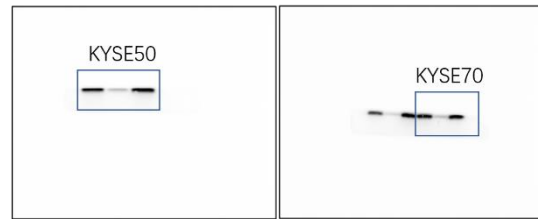

Anti-NUDT5 antibody

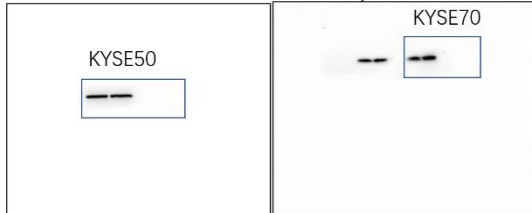

Anti-MEK antibody

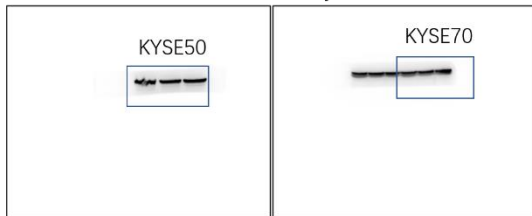

Anti-p-MEK antibody

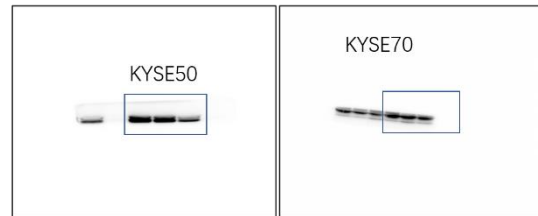

Anti-ERK antibody

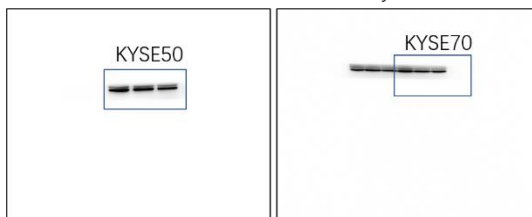

Anti-p-ERK antibody

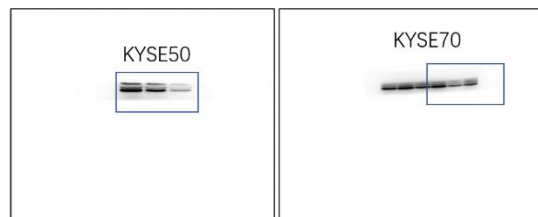

Anti-Akt antibody

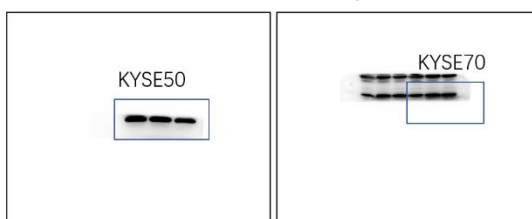

Anti-p-Akt antibody

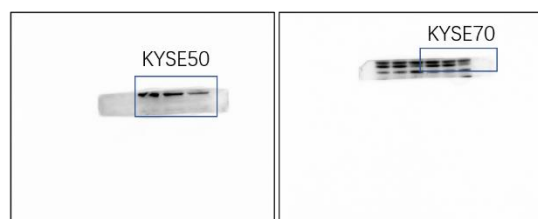

Supplement: peerj-08-9195-s002.pdf [file peerj-08-9195-s002.pdf]
