# Supplementary material for: The high expression of MTH1 and NUDT5 predict a poor survival and are associated with malignancy of esophageal squamous cell carcinoma
Source: PeerJ. 2020 May 26;8:e9195. doi: 10.7717/peerj.9195 (PMC7258951; doi:10.7717/peerj.9195)
Supplement: Supplemental Information 1 — All experiments were repeated three times. [file peerj-08-9195-s001.xlsx]

## Sheet: Tissue array -1
Patients number	Date of operation	survival condition	follow-up time	survival time	Gender	Age	Tumor surgical organ	Distant metastasis	pathological classification	pathological grading	T stage	N stage	M stage	AJCC clinical stage	Vascular invasion	Lymph node invasion
D08A1720	2006-01-19	death	2008-08-09	31	Male	65	esophagus	No	squamous-cell carcinomas	Ⅰ-Ⅱ	T3	N1	M0	2	No	Yes
D08A1719	2006-01-23	death	2006-11-05	10	Male	56	esophagus	No	squamous-cell carcinomas	Ⅱ	T3	N1	M0	3A	No	No
D08A1731	2006-04-28	death	2007-11-01	19	Male	60	esophagus	No	squamous-cell carcinomas	Ⅱ	T3	N0	M0	3A	No	Yes
D08A1732	2006-05-22	death	2007-03-15	10	Male	64	esophagus	No	squamous-cell carcinomas	Ⅰ-Ⅱ	T3	N0	M0	2	No	Yes
D08A1740	2006-06-28	death	2007-03-09	9	Male	59	esophagus	No	squamous-cell carcinomas	Ⅰ-Ⅱ	T3	N0	M0	2B	No	Yes
D08A1742	2006-07-06	death	2007-03-09	8	Male	57	esophagus	No	squamous-cell carcinomas	Ⅱ-Ⅲ	T2	N1	M0	2B	No	Yes
D08A1743	2006-07-10	death	2008-10-15	27	Female	58	esophagus	No	squamous-cell carcinomas	Ⅱ	T3	N1	M0	3A	No	No
D08A0181	2006-07-24	death	2012-03-16	58	Male	70	esophagus	No	squamous-cell carcinomas	Ⅱ-Ⅲ	T3	N0	M0	2A	Yes	No
D08A0184	2006-07-31	death	2008-09-08	26	Male	73	esophagus	No	squamous-cell carcinomas	Ⅱ-Ⅲ	T3	N0	M0	3A	No	Yes
D08A0185	2006-08-01	death	2007-09-05	13	Female	74	esophagus	No	squamous-cell carcinomas	Ⅰ-Ⅲ	T3	N0	M0	3	No	Yes
D08A0187	2006-08-28	survival	2015-07-31	107	Male	66	esophagus	No	squamous-cell carcinomas	Ⅰ-Ⅱ	T3	N2	M0	2B	No	No
D08A0188	2006-09-07	death	2007-12-25	15	Male	73	esophagus	No	squamous-cell carcinomas	Ⅰ-Ⅱ	T3	N0	M0	2B	No	No
D08A0189	2006-09-14	survival	2015-07-31	106	Female	74	esophagus	No	squamous-cell carcinomas	Ⅰ		N2	M0		No	No
D08A0196	2006-09-28	death	2011-09-12	60	Male	78	esophagus	No	squamous-cell carcinomas	Ⅱ		N0	M0		No	Yes
D08A1746	2006-11-03	death	2008-10-11	23	Female	52	esophagus	No	squamous-cell carcinomas	Ⅱ-Ⅲ	T3	N1	M0	3A	No	No
D08A1747	2006-11-27	death	2007-03-09	4	Male	73	esophagus	No	squamous-cell carcinomas	Ⅰ-Ⅱ	T2	N2	M0	2	No	No
D08A0260	2007.1	death	2009-08-14	31	Male	75	esophagus	No	squamous-cell carcinomas	Ⅱ	T3	N2	M0	2	No	No
D08A0284	2007.1	death	2011-04-13	51	Male	51	esophagus	No	squamous-cell carcinomas	Ⅱ	T3		M0	2B	No	No
D08A0285	2007-01-11	death	2010-12-31	47	Male	51	esophagus	No	squamous-cell carcinomas	Ⅱ-Ⅲ	T3	N0	M0	3B	No	YES
D08A0286	2007-01-18	death	2009-06-17	29	Male	73	esophagus	No	squamous-cell carcinomas	Ⅰ		N2	M0		No	No
D08A1750	2007-02-28	death	2007-12-09	10	Male	59	esophagus	No	squamous-cell carcinomas	Ⅱ	T3	N0	M0	3B	No	No
D08A1751	2007-03-08	death	2008-10-27	19	Female	73	esophagus	No	squamous-cell carcinomas	Ⅲ	T3	N3	M0	2	No	No
D08A0290	2007.3	death	2009-01-11	22	Male	63	esophagus	No	squamous-cell carcinomas	Ⅱ	T3	N0	M0	3A	No	YES
D08A0293	2007.3	death	2010-02-25	35	Male	51	esophagus	No	squamous-cell carcinomas	Ⅱ	T3	N0	M0	3B	Yes	YES
D08A0294	2007-03-14	death	2008-01-30	10	Male	60	esophagus	No	squamous-cell carcinomas	Ⅰ-Ⅱ	T3	N1	M0	3B	No	YES
D08A0333	2007.3	survival	2015-07-31	100	Female	51	esophagus	No	squamous-cell carcinomas	Ⅲ	T3	N3	M0		No	No
D08A1755	2007-04-12	death	2007-12-26	8	Female	50	esophagus	No	squamous-cell carcinomas	Ⅲ	T3	N1	M0	2	No	No
D08A0337	2007.4	death	2009-03-08	23	Male	71	esophagus	No	squamous-cell carcinomas	Ⅰ-Ⅲ	T3	N0	M0	3B	No	No
D08A0340	2007-04-23	death	2008-01-30	9	Male	51	esophagus	No	squamous-cell carcinomas	Ⅰ-Ⅱ	T2	N0	M0	2	No	No
D08A0373	2007.5	death	2007-11-27	6	Male	64	esophagus	No	squamous-cell carcinomas	Ⅱ-Ⅲ	T4	N0	M0	3C	No	No
D08A0376	2007.5	death	2010-12-16	43	Male	64	esophagus	No	squamous-cell carcinomas	Ⅱ	T3	N0	M0	2B	No	No
D08A0379	2007.5	death	2011-01-05	44	Male	55	esophagus	No	squamous-cell carcinomas	Ⅱ	T2	N1	M0	2B	No	No
D08A0380	2007.5	death	2008-01-13	8	Male	52	esophagus	No	squamous-cell carcinomas	Ⅱ	T3	N1	M0	3A	No	No
D08A0381	2007.5	death	2008-02-18	9	Male	59	esophagus	No	squamous-cell carcinomas	Ⅰ-Ⅱ	T3	N0	M0	3C	No	No
D08A0383	2007.6	death	2008-10-23	16	Male	70	esophagus	No	squamous-cell carcinomas	Ⅱ	T3	N1	M0	3A	No	No
D08A0384	2007.6	survival	2015-07-31	97	Male	65	esophagus	No	squamous-cell carcinomas	Ⅰ-Ⅲ	T3	N1	M0	2A	No	No
D08A0385	2007.6	death	2009-08-21	26	Male	63	esophagus	No	squamous-cell carcinomas	Ⅲ	T2	N0	M0	2B	No	No
D08A0388	2007.6	survival	2015-07-31	97	Female	56	esophagus	No	squamous-cell carcinomas	Ⅱ-Ⅲ	T3	N1	M0	2B	No	No
D08A0393	2007.7	death	2008-05-01	10	Female	67	esophagus	No	squamous-cell carcinomas	Ⅱ-Ⅲ	T3	N0	M0	2B	No	No
D08A0400	2007.7	death	2011-02-09	43	Male	48	esophagus	No	squamous-cell carcinomas	Ⅰ-Ⅱ	T3	N0	M0	3A	No	No
D08A0401	2007.7	death	2011-03-12	44	Male	53	esophagus	No	squamous-cell carcinomas	Ⅰ	T3	N0	M0	3A	No	No
D08A0402	2007.8	survival	2015-07-31	95	Female	71	esophagus	No	squamous-cell carcinomas	Ⅰ-Ⅱ	T3	N0	M0	2A	No	No
D08A0403	2007.8	death	2009-07-23	23	Male	69	esophagus	No	squamous-cell carcinomas	Ⅱ	T3	N1	M0	3A	No	No
D08A0404	2007.8	survival	1905-07-05 21:36:00	loss to follow-up	Male	61	esophagus	No	squamous-cell carcinomas	Ⅱ	T3	N0	M0	3A	No	No
D08A0405	2007.8	death	2007-12-26	4	Male	77	esophagus	No	squamous-cell carcinomas	Ⅰ-Ⅱ	T3	N3	M0	2	No	No
D08A0477	2007.8	death	2008-05-22	9	Male	61	esophagus	No	squamous-cell carcinomas	Ⅱ	T3	N0	M0	3A	No	No
D08A0569	2008.2	death	2009-03-25	13	Male	59	esophagus	No	squamous-cell carcinomas	Ⅱ	T3	N0	M0	2	No	No
D08A0571	2008.2	death	2009-05-20	15	Female	56	esophagus	No	squamous-cell carcinomas	Ⅱ	T4	N0	M0	3	No	No
D08A0572	2008.2	death	2009-03-15	13	Female	68	esophagus	No	squamous-cell carcinomas	Ⅰ-Ⅱ	T3	N2	M0	2	No	No
D08A0573	2008.2	death	2008-04-01	2	Male	77	esophagus	No	squamous-cell carcinomas	Ⅰ-Ⅱ	T3	N0	M0	2B	No	No
D08A0577	2008.3	survival	2015-07-31	88	Male	57	esophagus	No	squamous-cell carcinomas	Ⅰ-Ⅱ	T2	N0	M0	2B	No	No
D08A0579	2008.3	death	2010-12-13	33	Male	61	esophagus	No	squamous-cell carcinomas	Ⅰ-Ⅱ	T3	N0	M0	2	No	No
D08A0580	2008.3	death	2009-03-23	12	Male	68	esophagus	No	squamous-cell carcinomas	Ⅲ	T3	N2	M0	3C	No	No
D08A0581	2008.3	death	2009-03-05	12	Female	72	esophagus	No	squamous-cell carcinomas	Ⅱ	T3	N0	M0	2A	No	No
D08A0582	2008.3	survival	2015-07-31	88	Male	57	esophagus	No	squamous-cell carcinomas	Ⅰ	T3	N1	M0	2A	No	No
D08A0583	2008.3	death	2008-07-07	4	Male	74	esophagus	No	squamous-cell carcinomas	Ⅱ	T3	N3	M0	2B	No	No
D08A0584	2008.3	death	2008-08-07	5	Male	72	esophagus	No	squamous-cell carcinomas	Ⅱ	T2	N1	M0	3A	No	No
D08A0588	2008.3	death	2010-09-13	30	Female	65	esophagus	No	squamous-cell carcinomas	Ⅰ-Ⅱ	T3	N1	M0	2B	No	No
D08A0593	2008.4	survival	2015-07-31	87	Male	75	esophagus	No	squamous-cell carcinomas	Ⅱ	T3	N1	M0	2B	No	No
D08A0596	2008.4	death	2010-02-21	22	Female	63	esophagus	No	squamous-cell carcinomas	Ⅱ	T3	N3	M0	2B	No	Yes
D08A0648	2008.4	death	2008-09-01	5	Female	73	esophagus	No	squamous-cell carcinomas	Ⅱ	T3	N0	M0	3B	Yes	No
D08A0649	2008.4	death	2008-04-28	0	Male	76	esophagus	No	squamous-cell carcinomas	Ⅰ-Ⅱ	T3	N1	M0	2	No	No
D08A0650	2008.5	death	2008-10-13	5	Male	61	esophagus	No	squamous-cell carcinomas	Ⅱ	T3	N1	M0	3A	No	No
D08A0692	2008.7	death	2009-10-07	15	Male	79	esophagus	No	squamous-cell carcinomas	Ⅱ	T2	N1	M0	3C	No	No
D08A0694	2008.7	death	2008-12-26	5	Male	72	esophagus	No	squamous-cell carcinomas	Ⅱ-Ⅲ	T3	N0	M0	3A	No	No
D08A0696	2008.7	death	2009-11-23	16	Male	54	esophagus	No	squamous-cell carcinomas	Ⅱ	T3	N2	M0	3A	No	No
D08A0697	2008-07-02	survival	2015-07-31	84	Male	76	esophagus	No	squamous-cell carcinomas	Ⅰ-Ⅱ	T2	N0	M0	2B	No	No
D08A0699	2008.7	death	2010-09-28	26	Male	65	esophagus	No	squamous-cell carcinomas	Ⅲ	T3	N1	M0	3C	No	No
D08A0700	2008.7	survival	2015-07-31	84	Female	81	esophagus	No	squamous-cell carcinomas	Ⅰ-Ⅱ	T2	N1	M0	2	No	No
D08A0701	2008-07-15	survival	2015-07-31	84	Female	68	esophagus	No	squamous-cell carcinomas	Ⅱ	T3	N0	M0	3A	No	No
D08A0702	2008.7	death	2009-08-06	1	Male	81	esophagus	No	squamous-cell carcinomas	Ⅲ	T3	N0	M0	3A	No	No
D08A0718	2008.8	death	2009-01-10	5	Male	64	esophagus	No	squamous-cell carcinomas	Ⅰ	T3	N1	M0	3A	No	No
D08A0719	2008.8	survival	2015-07-31	83	Female	71	esophagus	No	squamous-cell carcinomas	Ⅰ-Ⅱ	T1	N2	M0	1	No	No
D08A0721	2008-08-21	death	2009-11-26	15	Male	48	esophagus	No	squamous-cell carcinomas	Ⅱ	T3	N0	M0	3B	No	No
D08A0722	2008.8	death	2013-03-14	55	Male	76	esophagus	No	squamous-cell carcinomas	Ⅱ-Ⅲ	T1	N1	M0	1	No	No
D08A0803	2008.8	survival	2015-07-31	83	Male	52	esophagus	No	squamous-cell carcinomas	Ⅰ-Ⅱ	T2	N2	M0	2B	No	No
D08A0723	2008-09-11	death	2010-10-07	25	Female	68	esophagus	No	squamous-cell carcinomas	Ⅲ	T3	N2	M0	3A	No	No
D08A0746	2008.9	survival	2015-07-31	82	Female	74	esophagus	No	squamous-cell carcinomas	Ⅱ-Ⅲ	T1	N0	M0	1	No	No
D08A0748	2008.10	survival	2015-07-31	81	Male	63	esophagus	No	squamous-cell carcinomas	Ⅱ	T1	N0	M0	1	No	No
D08A0753	2008.10	death	2009-08-07	10	Male	52	esophagus	No	squamous-cell carcinomas	Ⅰ-Ⅱ	T3	N2	M0	3A	No	No
D08A1729	2006-04-21	death	2007-07-09	15	Female	67	esophagus	No	squamous-cell carcinomas	Ⅲ	T3	N2	M0	3B	No	Yes
D08A1735	2006-05-24	death	2008-05-01	24	Male	72	esophagus	No	squamous-cell carcinomas	Ⅱ	T3	N1	M0	2B	No	Yes
D08A0194	2006-09-12	death	2007-03-13	6	Male	69	esophagus	No	squamous-cell carcinomas	Ⅱ	T3	N1	M0	3A	Yes	Yes
D08A0334	2007.3	death	2007-05-08	2	Male	72	esophagus	No	squamous-cell carcinomas	Ⅱ	T3	N0	M0	3B	No	No
D08A0342	2007.04	death	2009-07-30	27	Male	74	esophagus	No	squamous-cell carcinomas	Ⅱ-Ⅲ	T3	N2	M0	3B	No	No
D08A0391	2007.7	death	2010-04-10	33	Male	73	esophagus	No	squamous-cell carcinomas	Ⅰ-Ⅱ	T3	N2	M0	2B	No	No
D08A0394	2007.7	death	2008-01-30	6	Male	51	esophagus	No	squamous-cell carcinomas	Ⅰ-Ⅱ	T3	N0	M0	2B	No	No
D08A0395	2007.7	death	2008-03-05	8	Male	49	esophagus	No	squamous-cell carcinomas	Ⅱ	T3	N2	M0	3B	No	No
D08A0397	2007.7	death	2007-09-04	2	Female	82	esophagus	No	squamous-cell carcinomas	Ⅱ-Ⅲ	T3	N0	M0	3B	No	No
D08A0589	2008.3	death	2009-06-13	15	Male	65	esophagus	No	squamous-cell carcinomas	Ⅱ-Ⅲ	T3	N2	M0	3A	No	No
D08A0595	2008.4	death	2008-09-24	5	Male	80	esophagus	No	squamous-cell carcinomas	Ⅰ-Ⅱ	T3	N1	M0	3A	No	No
D08A0652	2008.5	survival	2015-07-31	86	Female	79	esophagus	No	squamous-cell carcinomas	Ⅱ-Ⅲ	T3	N1	M0	2B	No	No
D08A0659	2008.6	death	2009-01-12	7	Male	50	esophagus	No	squamous-cell carcinomas	Ⅰ	T3	N2	M0	3B	No	No
D08A0660	2008.6	death	2009-08-01	14	Male	54	esophagus	No	squamous-cell carcinomas	Ⅱ	T4	N2	M0	3C	No	No
D08A0705	2008.8	survival	2015-07-31	83	Female	74	esophagus	No	squamous-cell carcinomas	Ⅱ	T3	N0	M0	2A	No	No
D08A0720	2008.8	death	2008-12-05	4	Male	62	esophagus	No	squamous-cell carcinomas	Ⅰ-Ⅱ	T3	N2	M0	3B	No	No
D08A0804	2008-08-26	death	2009-06-04	10	Female	74	esophagus	No	squamous-cell carcinomas	Ⅱ	T3	N0	M0	2	No	No
D08A0724	2008.9	death	2009-07-05	10	Male	74	esophagus	No	squamous-cell carcinomas	Ⅱ	T3	N2	M0	3B	No	No
D08A0745	2008.9	death	2010-12-09	27	Male	79	esophagus	No	squamous-cell carcinomas	Ⅲ	T3	N1	M0	3A	No	No
D08A0752	2008-10-29	death	2011-02-27	28	Male	65	esophagus	No	squamous-cell carcinomas	Ⅱ	T3	N1	M0	3A	No	No

## Sheet: Tissue array -2
	ShGnghGi Outdo Biotech CompGny
	(CGt No.)：	HEso-Squ180Sur-04
	Lot No.	XT15-012
	A1	D08A1720-B30-C1		sophageal cancer	squamous-cell carcinoma
	A2	D08A1720-B30-N1		adjacent tissues	Esophageal mucosa
	A3	D08A1719-B30-C1		sophageal cancer	squamous-cell carcinoma
	A4	D08A1719-B30-N1		adjacent tissues	Esophageal mucosa
	A5	D08A1731-B30-C1		sophageal cancer	squamous-cell carcinoma
	A6	D08A1731-B30-N1		adjacent tissues	Esophageal mucosa
	A7	D08A1732-B30-C1		sophageal cancer	squamous-cell carcinoma
	A8	D08A1732-B30-N1		adjacent tissues	Esophageal mucosa
	A9	D08A1740-B30-C1		sophageal cancer	squamous-cell carcinoma
	A10	D08A1740-B30-N1		adjacent tissues	Esophageal mucosa
	A11	D08A1742-B30-C1		sophageal cancer	squamous-cell carcinoma
	A12	D08A1742-B30-N1		adjacent tissues	Esophageal mucosa
	A13	D08A1743-B30-C1		sophageal cancer	squamous-cell carcinoma
	A14	D08A1743-B30-N1		adjacent tissues	Esophageal mucosa
	A15	D08A0181-B30-C1		sophageal cancer	squamous-cell carcinoma
	A16	D08A0181-B30-P1		adjacent tissues	Esophageal mucosa
	A17	D08A0184-B30-C1		sophageal cancer	squamous-cell carcinoma
	A18	D08A0184-B30-P1		adjacent tissues	Esophageal mucosa
	B1	D08A0185-B30-C1		sophageal cancer	squamous-cell carcinoma
	B2	D08A0185-B30-P1		adjacent tissues	Esophageal mucosa
	B3	D08A0187-B30-C1		sophageal cancer	squamous-cell carcinoma
	B4	D08A0187-B30-P1		adjacent tissues	Esophageal mucosa
	B5	D08A0188-B30-C1		sophageal cancer	squamous-cell carcinoma
	B6	D08A0188-B30-P1		adjacent tissues	Esophageal mucosa
	B7	D08A0189-B30-C1		sophageal cancer	squamous-cell carcinoma
	B8	D08A0189-B30-P1		adjacent tissues	Esophageal mucosa
	B9	D08A0196-B30-C1		sophageal cancer	squamous-cell carcinoma
	B10	D08A0196-B30-P1		adjacent tissues	Esophageal mucosa
	B11	D08A1746-B30-C1		sophageal cancer	squamous-cell carcinoma
	B12	D08A1746-B30-N1		adjacent tissues	Esophageal mucosa
	B13	D08A1747-B30-C1		sophageal cancer	squamous-cell carcinoma
	B14	D08A1747-B30-N1		adjacent tissues	Esophageal mucosa
	B15	D08A0260-B30-C1		sophageal cancer	squamous-cell carcinoma
	B16	D08A0260-B30-P1		adjacent tissues	Esophageal mucosa
	B17	D08A0284-B30-C1		sophageal cancer	squamous-cell carcinoma
	B18	D08A0284-B30-P1		adjacent tissues	Esophageal mucosa
	C1	D08A0285-B30-C1		sophageal cancer	squamous-cell carcinoma
	C2	D08A0285-B30-P1		adjacent tissues	Esophageal mucosa
	C3	D08A0286-B30-C1		sophageal cancer	squamous-cell carcinoma
	C4	D08A0286-B30-P1		adjacent tissues	Esophageal mucosa
	C5	D08A1750-B30-C1		sophageal cancer	squamous-cell carcinoma
	C6	D08A1750-B30-N1		adjacent tissues	Esophageal mucosa
	C7	D08A1751-B30-C1		sophageal cancer	squamous-cell carcinoma
	C8	D08A1751-B30-N1		adjacent tissues	Esophageal mucosa
	C9	D08A0290-B30-C1		sophageal cancer	squamous-cell carcinoma
	C10	D08A0290-B30-P1		adjacent tissues	Esophageal mucosa
	C11	D08A0293-B30-C1		sophageal cancer	squamous-cell carcinoma
	C12	D08A0293-B30-P1		adjacent tissues	Esophageal mucosa
	C13	D08A0294-B30-C1		sophageal cancer	squamous-cell carcinoma
	C14	D08A0294-B30-P1		adjacent tissues	Esophageal mucosa
	C15	D08A0333-B30-C1		sophageal cancer	squamous-cell carcinoma
	C16	D08A0333-B30-P1		adjacent tissues	Esophageal mucosa
	C17	D08A1755-B30-C1		sophageal cancer	squamous-cell carcinoma
	C18	D08A1755-B30-N1		adjacent tissues	Esophageal mucosa
	D1	D08A0337-B30-P1		sophageal cancer	squamous-cell carcinoma
	D2	D08A0337-B30-C1		adjacent tissues	Esophageal mucosa
	D3	D08A0340-B30-C1		sophageal cancer	squamous-cell carcinoma
	D4	D08A0340-B30-P1		adjacent tissues	Esophageal mucosa
	D5	D08A0373-B30-C1		sophageal cancer	squamous-cell carcinoma
	D6	D08A0373-B30-P1		adjacent tissues	Esophageal mucosa
	D7	D08A0376-B30-C1		sophageal cancer	squamous-cell carcinoma
	D8	D08A0376-B30-P1		adjacent tissues	Esophageal mucosa
	D9	D08A0379-B30-C1		sophageal cancer	squamous-cell carcinoma
	D10	D08A0379-B30-P1		adjacent tissues	Esophageal mucosa
	D11	D08A0380-B30-C1		sophageal cancer	vsquamous-cell carcinoma
	D12	D08A0380-B30-P1		adjacent tissues	Esophageal mucosa
	D13	D08A0381-B30-C1		sophageal cancer	squamous-cell carcinoma
	D14	D08A0381-B30-P1		adjacent tissues	Esophageal mucosa
	D15	D08A0383-B30-C1		sophageal cancer	squamous-cell carcinoma
	D16	D08A0383-B30-P1		adjacent tissues	Esophageal mucosa
	D17	D08A0384-B30-C1		sophageal cancer	squamous-cell carcinoma
	D18	D08A0384-B30-P1		adjacent tissues	Esophageal mucosa
	E1	D08A0385-B30-C1		sophageal cancer	squamous-cell carcinoma
	E2	D08A0385-B30-P1		adjacent tissues	Esophageal mucosa
	E3	D08A0388-B30-C1		sophageal cancer	squamous-cell carcinoma
	E4	D08A0388-B30-P1		adjacent tissues	Esophageal mucosa
	E5	D08A0393-B30-C1		sophageal cancer	squamous-cell carcinoma
	E6	D08A0393-B30-P1		adjacent tissues	Esophageal mucosa
	E7	D08A0400-B30-C1		sophageal cancer	squamous-cell carcinoma
	E8	D08A0400-B30-P1		adjacent tissues	Esophageal mucosa
	E9	D08A0401-B30-C1		sophageal cancer	squamous-cell carcinoma
	E10	D08A0401-B30-P1		adjacent tissues	Esophageal mucosa
	E11	D08A0402-B30-C1		sophageal cancer	squamous-cell carcinoma
	E12	D08A0402-B30-P1		adjacent tissues	Esophageal mucosa
	E13	D08A0403-B30-C1		sophageal cancer	squamous-cell carcinoma
	E14	D08A0403-B30-P1		adjacent tissues	Esophageal mucosa
	E15	D08A0404-B30-C1		sophageal cancer	squamous-cell carcinoma
	E16	D08A0404-B30-P1		adjacent tissues	Esophageal mucosa
	E17	D08A0405-B30-C1		sophageal cancer	squamous-cell carcinoma
	E18	D08A0405-B30-P1		adjacent tissues	Esophageal mucosa
	F1	D08A0477-B30-C1		sophageal cancer	squamous-cell carcinoma
	F2	D08A0477-B30-P1		adjacent tissues	Esophageal mucosa
	F3	D08A0569-B30-C1		sophageal cancer	squamous-cell carcinoma
	F4	D08A0569-B30-C1		adjacent tissues	Esophageal mucosa
	F5	D08A0571-B30-C1		sophageal cancer	squamous-cell carcinoma
	F6	D08A0571-B30-P1		adjacent tissues	Esophageal mucosa
	F7	D08A0572-B30-C1		sophageal cancer	squamous-cell carcinoma
	F8	D08A0572-B30-P1		adjacent tissues	Esophageal mucosa
	F9	D08A0573-B30-C1		sophageal cancer	squamous-cell carcinoma
	F10	D08A0573-B30-P1		adjacent tissues	Esophageal mucosa
	F11	D08A0577-B30-C1		sophageal cancer	squamous-cell carcinoma
	F12	D08A0577-B30-P1		adjacent tissues	Esophageal mucosa
	F13	D08A0579-B30-C1		sophageal cancer	squamous-cell carcinoma
	F14	D08A0579-B30-P1		adjacent tissues	Esophageal mucosa
	F15	D08A0580-B30-C1		sophageal cancer	squamous-cell carcinoma
	F16	D08A0580-B30-P1		adjacent tissues	Esophageal mucosa
	F17	D08A0581-B30-C1		sophageal cancer	squamous-cell carcinoma
	F18	D08A0581-B30-P1		adjacent tissues	Esophageal mucosa
	G1	D08A0582-B30-C1		sophageal cancer	squamous-cell carcinoma
	G2	D08A0582-B30-P1		adjacent tissues	Esophageal mucosa
	G3	D08A0583-B30-C1		sophageal cancer	squamous-cell carcinoma
	G4	D08A0583-B30-P1		adjacent tissues	Esophageal mucosa
	G5	D08A0584-B30-C1		sophageal cancer	squamous-cell carcinoma
	G6	D08A0584-B30-P1		adjacent tissues	Esophageal mucosa
	G7	D08A0588-B30-C1		sophageal cancer	squamous-cell carcinoma
	G8	D08A0588-B30-P1		adjacent tissues	Esophageal mucosa
	G9	D08A0593-B30-C1		sophageal cancer	squamous-cell carcinoma
	G10	D08A0593-B30-P1		adjacent tissues	Esophageal mucosa
	G11	D08A0596-B30-C1		sophageal cancer	squamous-cell carcinoma
	G12	D08A0596-B30-P1		adjacent tissues	Esophageal mucosa
	G13	D08A0648-B30-C1		sophageal cancer	squamous-cell carcinoma
	G14	D08A0648-B30-P1		adjacent tissues	Esophageal mucosa
	G15	D08A0649-B30-C1		sophageal cancer	squamous-cell carcinoma
	G16	D08A0649-B30-P1		adjacent tissues	Esophageal mucosa
	G17	D08A0650-B30-C1		sophageal cancer	squamous-cell carcinoma
	G18	D08A0650-B30-P1		adjacent tissues	Esophageal mucosa
	H1	D08A0692-B30-C1		sophageal cancer	squamous-cell carcinoma
	H2	D08A0692-B30-P1		adjacent tissues	Esophageal mucosa
	H3	D08A0694-B30-C1		sophageal cancer	squamous-cell carcinoma
	H4	D08A0694-B30-P1		adjacent tissues	Esophageal mucosa
	H5	D08A0696-B30-C1		sophageal cancer	squamous-cell carcinoma
	H6	D08A0696-B30-P1		adjacent tissues	Esophageal mucosa
	H7	D08A0697-B30-C1		sophageal cancer	squamous-cell carcinoma
	H8	D08A0697-B30-P1		adjacent tissues	Esophageal mucosa
	H9	D08A0699-B30-C1		sophageal cancer	squamous-cell carcinoma
	H10	D08A0699-B30-P1		adjacent tissues	Esophageal mucosa
	H11	D08A0700-B30-C1		sophageal cancer	squamous-cell carcinoma
	H12	D08A0700-B30-P1		adjacent tissues	Esophageal mucosa
	H13	D08A0701-B30-C1		sophageal cancer	squamous-cell carcinoma
	H14	D08A0701-B30-P1		adjacent tissues	Esophageal mucosa
	H15	D08A0702-B30-C1		sophageal cancer	squamous-cell carcinoma
	H16	D08A0702-B30-P1		adjacent tissues	Esophageal mucosa
	H17	D08A0718-B30-C1		sophageal cancer	squamous-cell carcinoma
	H18	D08A0718-B30-P1		adjacent tissues	Esophageal mucosa
	I1	D08A0719-B30-C1		sophageal cancer	squamous-cell carcinoma
	I2	D08A0719-B30-P1		adjacent tissues	Esophageal mucosa
	I3	D08A0721-B30-C1		sophageal cancer	squamous-cell carcinoma
	I4	D08A0721-B30-P1		adjacent tissues	Esophageal mucosa
	I5	D08A0722-B30-C1		sophageal cancer	squamous-cell carcinoma
	I6	D08A0722-B30-P1		adjacent tissues	Esophageal mucosa
	I7	D08A0803-B30-C1		sophageal cancer	squamous-cell carcinoma
	I8	D08A0803-B30-P1		adjacent tissues	Esophageal mucosa
	I9	D08A0723-B30-C1		sophageal cancer	squamous-cell carcinoma
	I10	D08A0723-B30-P1		adjacent tissues	Esophageal mucosa
	I11	D08A0746-B30-C1		sophageal cancer	squamous-cell carcinoma
	I12	D08A0746-B30-P1		adjacent tissues	Esophageal mucosa
	I13	D08A0748-B30-C1		sophageal cancer	squamous-cell carcinoma
	I14	D08A0748-B30-P1		adjacent tissues	Esophageal mucosa
	I15	D08A0753-B30-C1		sophageal cancer	squamous-cell carcinoma
	I16	D08A0753-B30-P1		adjacent tissues	Esophageal mucosa
	I17	D08A1729-B30-C1		sophageal cancer	squamous-cell carcinoma
	I18	D08A1735-B30-C1		sophageal cancer	squamous-cell carcinoma
	J1	D08A0194-B30-C1		sophageal cancer	squamous-cell carcinoma
	J2	D08A0334-B30-C1		sophageal cancer	squamous-cell carcinoma
	J3	D08A0342-B30-C1		sophageal cancer	squamous-cell carcinoma
	J4	D08A0391-B30-C1		sophageal cancer	squamous-cell carcinoma
	J5	D08A0394-B30-C1		sophageal cancer	squamous-cell carcinoma
	J6	D08A0395-B30-C1		sophageal cancer	squamous-cell carcinoma
	J7	D08A0397-B30-C1		sophageal cancer	squamous-cell carcinoma
	J8	D08A0589-B30-C1		sophageal cancer	squamous-cell carcinoma
	J9	D08A0595-B30-C1		sophageal cancer	squamous-cell carcinoma
	J10	D08A0652-B30-C1		sophageal cancer	squamous-cell carcinoma
	J11	D08A0659-B30-C1		sophageal cancer	squamous-cell carcinoma
	J12	D08A0660-B30-C1		sophageal cancer	squamous-cell carcinoma
	J13	D08A0705-B30-C1		sophageal cancer	squamous-cell carcinoma
	J14	D08A0720-B30-C1		sophageal cancer	squamous-cell carcinoma
	J15	D08A0804-B30-C1		sophageal cancer	squamous-cell carcinoma
	J16	D08A0724-B30-C1		sophageal cancer	squamous-cell carcinoma
	J17	D08A0745-B30-C1		sophageal cancer	squamous-cell carcinoma
	J18	D08A0752-B30-C1		sophageal cancer	squamous-cell carcinoma
	J19	location anchors

## Sheet: Final score of A-H of Fig 1.
	MTH1	proportion of positive cells	intensity category	score		NUDT5		proportion of positive cells	intensity category	score
author1	Fig 1-A	1	1	1		author1	Fig1-E	1	1	1
	Fig1-B	3	2	9			Fig1-F	3	2	6
	Fig1-C	2	1	2			Fig1-G	1	1	1
	Fig1-D	4	2	8			Fig1-H	4	3	12
author2	Fig 1-A	1	1	1		author2	Fig1-E	1	1	1
	Fig1-B	3	2	9			Fig1-F	3	2	6
	Fig1-C	2	1	2			Fig1-G	1	1	1
	Fig1-D	4	2	8			Fig1-H	4	3	12
author3	Fig 1-A	1	1	1		author3	Fig1-E	1	1	1
	Fig1-B	3	2	9			Fig1-F	3	2	6
	Fig1-C	2	1	2			Fig1-G	1	1	1
	Fig1-D	4	2	8			Fig1-H	4	3	12

## Sheet: H score of Fig1I and J
MTH1	Tumor staining intensity was graded	The proportion of the positively stained cells was scored	H Sscore		NUDT5	Tumor staining intensity was graded	The proportion of the positively stained cells was scored	H Sscore
	1	4	4			1	4	4
	2	2	4			1	4	4
	1	4	4			1	4	4
	1	4	4			1	4	4
	1	4	4			2	4	8
	2	4	8			2	4	8
	3	4	12			2	4	8
	3	4	12			2	4	8
	3	3	9			1	4	4
	3	3	9			2	4	8
	1	4	4			2	4	8
	1	4	4			2	4	8
	1	4	4			1	4	4
	1	4	4			1	4	4
	1	4	4			1	4	4
	1	4	4			2	4	8
	2	3	6			1	4	4
	3	4	12			3	4	12
	3	3	9			1	4	4
	1	4	4			2	4	8
	1	4	4			2	4	8
	1	4	4			2	4	8
	1	4	4			2	4	8
	1	4	4			2	4	8
	1	4	4			2	4	8
	2	3	6			1	4	4
	1	4	4			1	4	4
	3	3	9			2	4	8
	2	4	8			2	4	8
	2	4	8			2	4	8
	2	4	8			2	4	8
	2	4	8			2	4	8
	1	4	4			1	4	4
	1	4	4			1	4	4
	3	3	9			1	4	4
	1	4	4			2	4	8
	1	4	4			2	4	8
	2	4	8			2	4	8
	1	4	4			2	4	8
	3	4	12			2	4	8
	2	4	8			2	4	8
	3	3	9			1	4	4
	3	4	12			2	4	8
	1	4	4			1	4	4
	1	4	4			2	4	8
	3	2	6			1	4	4
	1	4	4			2	4	8
	2	4	8			2	4	8
	3	4	12			2	4	8
	1	4	4			1	4	4
	2	4	8			1	4	4
	1	4	4			1	4	4
	1	4	4			1	4	4
	1	4	4			1	4	4
	2	3	6			1	4	4
	3	4	12			2	4	8
	2	4	8			2	4	8
	1	4	4			2	4	8
	3	3	9			1	4	4
	2	4	8			1	4	4
	2	4	8			1	4	4
	1	4	4			2	4	8
	1	4	4			1	4	4
	1	4	4			2	4	8
	3	4	12			2	4	8
	2	4	8			2	4	8
	1	4	4			1	4	4
	3	4	12			2	4	8
	1	4	4			1	4	4
	1	4	4			2	4	8
	1	4	4			2	4	8
	1	4	4			2	4	8
	1	4	4			1	4	4
	1	4	4			2	4	8
	3	4	12			2	4	8
	1	4	4			1	4	4
	1	4	4			2	4	8
	2	4	8			2	4	8
	3	4	12			2	4	8
	2	4	8			1	4	4
	3	3	9			2	4	8
	1	4	4			2	4	8
	2	4	8			2	4	8
	2	4	8			2	4	8
	2	4	8			2	4	8
	3	4	12			1	4	4
	1	4	4			2	4	8
	2	4	8			1	4	4
	1	4	4			1	4	4
	1	4	4			1	4	4
	2	3	6			1	4	4
	2	4	8			2	4	8
	3	4	12			2	4	8
	3	4	12			1	4	4

## Sheet: Fig2B
Wstern Blot of ESCC cell lines/ The Value of Gray Level Measurement
lane	WI-38	MIR-90	KYSE-30	KYSE-50	KYSE-70	KYSE-140	KYSE-450	KYSE-520
Density value (MTH1)	197.749	4433.88	11150.2	27816.7	33013.6	8584.4	14886.2	26716.7
gray-scale value(MTH1)	0.007116	0.148224	0.387173	0.988082	1.44444	0.291457	0.537512	1.0449
Density value (NUDT5)	913.849	1818.28	14470.2	17861.6	32909.9	26978.1	23507.2	22408.3
gray-scale value(NUDT5)	0.032885	0.060785	0.502453	0.634466	1.4399	0.915957	0.8488	0.876395
Density value (Tubulin)	27789.1	29913.3	28799.1	28152.2	22855.6	29453.4	27694.6	25568.7
lane	WI-38	MIR-90	KYSE-30	KYSE-50	KYSE-70	KYSE-140	KYSE-450	KYSE-520
Density value (MTH1)	191.485	12253.9	15267.2	36884.8	51735.2	27717.9	25681.6	28215.7
gray-scale value(MTH1)	0.00393687	0.265175	0.348583	0.846021	1.03734	0.467941	0.498822	0.622875
Density value (NUDT5)	901.556	4956.74	29086.5	35623.7	44313.8	57677.4	44708.1	34806.9
gray-scale value(NUDT5)	0.0185357	0.107265	0.664104	0.817097	0.888535	0.973726	0.868378	0.768379
Density value (Tubulin)	48638.9	46210.4	43798.1	43597.9	49872.8	59233.7	51484.6	45299.1
lane	WI-38	MIR-90	KYSE-30	KYSE-50	KYSE-70	KYSE-140	KYSE-450	KYSE-520
Density value (MTH1)	200.3	15142	7881.98	19041.1	26940.8	8391.2	7378.62	10341.9
gray-scale value(MTH1)	0.00801523	0.471656	0.588606	0.801074	1.13651	0.338751	0.537178	0.422479
Density value (NUDT5)	1065.33	7485.28	14310.5	18546.9	28776.9	30918.2	20475.2	22213
gray-scale value(NUDT5)	0.0426305	0.233158	1.06867	0.780282	1.21396	1.24816	1.49063	0.907422
Density value (Tubulin)	24989.9	32103.9	13390.9	23769.5	23704.9	24771	13735.9	24479.2

## Sheet: Fig2F
				OD450nm			OD450nm				OD450nm
			duplication	duplication	duplication		duplication	duplication	duplication		duplication	duplication	duplication
KYSE50	0h	ShCtrl	0.3366	0.3392	0.3086		0.2917	0.2889	0.282		0.2694	0.2498	0.2773
		ShMTH1	0.3455	0.3334	0.3329		0.2935	0.2849	0.294		0.2317	0.2849	0.2764
		ShNUDT5	0.3787	0.3555	0.3142		0.257	0.251	0.2687		0.257	0.251	0.2489
	24h	ShCtrl	0.4017	0.4003	0.3799		0.4389	0.4154	0.3915		0.3855	0.3915	0.4218
		ShMTH1	0.4045	0.3784	0.3863		0.3504	0.3511	0.3535		0.3543	0.3246	0.3254
		ShNUDT5	0.4428	0.4067	0.3896		0.2938	0.3053	0.316		0.3415	0.3221	0.3467
	48h	ShCtrl	0.765	0.7442	0.8463		0.7536	0.782	0.7576		0.73	0.7395	0.7477
		ShMTH1	0.6365	0.6151	0.6027		0.5305	0.5574	0.5516		0.5915	0.5547	0.5743
		ShNUDT5	0.695	0.6651	0.6448		0.4924	0.4983	0.5295		0.5806	0.4822	0.5295
	72h	ShCtrl	1.0516	1.1497	1.1556		1.3778	1.4267	1.4983		1.273	1.2729	1.4267
		ShMTH1	0.8943	0.842	0.8589		1.1562	1.1293	1.1417		1.1417	1.196	1.1773
		ShNUDT5	0.7292	0.7365	0.695		0.9633	0.958	0.8641		0.8602	1.0375	0.8528

## Sheet: Fig2G
			OD450nm				OD450nm				OD450nm
			duplication	duplication	duplication		duplication	duplication	duplication		duplication	duplication	duplication
KYSE70	0 h	ShCtrl	0.2479	0.2591	0.2571		0.3177	0.312	0.3227		0.2584	0.2583	0.2542
		ShMTH1	0.2364	0.2392	0.233		0.3012	0.2995	0.3146		0.2736	0.2598	0.2385
		ShNUDT5	0.243	0.239	0.2109		0.3443	0.3271	0.3269		0.2368	0.2382	0.2432
	24 h	ShCtrl	0.3223	0.3171	0.318		0.3824	0.3899	0.4096		0.3636	0.3823	0.3595
		ShMTH1	0.2745	0.2553	0.2703		0.3068	0.3061	0.3419		0.3189	0.3028	0.3027
		ShNUDT5	0.2696	0.2762	0.2694		0.3661	0.3462	0.3337		0.2928	0.285	0.3071
	48 h	ShCtrl	0.5867	0.5469	0.5654		0.609	0.591	0.6491		0.5276	0.6041	0.5948
		ShMTH1	0.3467	0.372	0.404		0.4507	0.4541	0.4962		0.4814	0.5273	0.4253
		ShNUDT5	0.3098	0.3904	0.3115		0.4799	0.4585	0.424		0.4479	0.4487	0.3089
	72h	ShCtrl	0.8985	0.8757	0.834		0.7784	0.7114	0.7454		0.9884	1.0547	0.9284
		ShMTH1	0.7767	0.7597	0.6236		0.6654	0.6311	0.6815		0.807	0.8079	0.7702
		ShNUDT5	0.6467	0.5914	0.5952		0.6694	0.648	0.576		0.6725	0.6661	0.6351

## Sheet: Cell cycle arrest in KYSE50
Cell cycle(1)		G0G1%	G2M%	S%
	KYSE50-ShMTH1(1)	67.32	14.23	18.45
	KYSE50-ShMTH1(2)	69.21	12.81	17.98
	KYSE50-ShMTH1(3)	67.93	13.9	18.17
	KYSE50-ShCtrl(1)	58.15	14.34	27.51
	KYSE50-ShCtrl(2)	58.77	15.15	26.09
	KYSE50-ShCtrl(3)	57.36	15.93	26.71
	KYSE50-ShNUDTN5(1)	69.64	14.26	16.1
	KYSE50-ShNUDTN5(2)	68.2	14.51	17.29
	KYSE50-ShNUDTN5(3)	68.79	12.14	19.08
Cell cycle(2)		G0G1%	G2M%	S%
	KYSE50-ShMTH1(1)	66.12	10.62	23.26
	KYSE50-ShMTH1(2)	67.9	9.03	23.07
	KYSE50-ShMTH1(3)	74.23	3.01	22.76
	KYSE50-ShCtrl(1)	55.65	17.2	27.15
	KYSE50-ShCtrl(2)	54.93	18.36	26.71
	KYSE50-ShCtrl(3)	55.87	16.65	27.48
	KYSE50-ShNUDTN5(1)	63.01	13.38	23.61
	KYSE50-ShNUDTN5(2)	63.46	12.95	23.58
	KYSE50-ShNUDTN5(3)	63.28	11.71	25.01
Cell cycle(3)		G0G1%	G2M%	S%
	KYSE50-ShMTH1(1)	77.11	7.33	15.57
	KYSE50-ShMTH1(2)	75.46	6.67	17.87
	KYSE50-ShMTH1(3)	76.02	7.91	16.06
	KYSE50-ShCtrl(1)	66.54	10.34	23.12
	KYSE50-ShCtrl(2)	67.25	9.61	23.14
	KYSE50-ShCtrl(3)	66.99	9.16	23.84
	KYSE50-ShNUDTN5(1)	72.27	8.91	18.83
	KYSE50-ShNUDTN5(2)	70.12	8.48	21.4
	KYSE50-ShNUDTN5(3)	71.46	9.32	19.21

## Sheet: Cell cycle arrest in KYSE70
Cell cycle(1)		G0G1%	G2M%	S%
	KYSE70-ShMTH1(1)	71.85	14.91	13.25
	KYSE70-ShMTH1(2)	69.7	16.85	13.45
	KYSE70-ShMTH1(3)	71.11	14.57	14.33
	KYSE70-ShCtrl(1)	64.94	20.31	14.76
	KYSE70-ShCtrl(2)	62.82	21.68	15.5
	KYSE70-ShCtrl(3)	64.79	20.94	14.26
	KYSE70-ShNUDTN5(1)	65.73	17.72	16.55
	KYSE70-ShNUDTN5(2)	72.19	16.63	11.19
	KYSE70-ShNUDTN5(3)	72.97	15.44	11.59
Cell cycle(2)		G0G1%	G2M%	S%
	KYSE70-ShMTH1(1)	75.83	6.67	17.5
	KYSE70-ShMTH1(2)	74.96	8.73	16.32
	KYSE70-ShMTH1(3)	73.96	9.65	16.39
	KYSE70-ShCtrl(1)	66.33	8.8	24.87
	KYSE70-ShCtrl(2)	65.16	10.74	24.1
	KYSE70-ShCtrl(3)	68.03	8.94	23.02
	KYSE70-ShNUDTN5(1)	70.44	9.16	20.4
	KYSE70-ShNUDTN5(2)	70.38	10.2	19.42
	KYSE70-ShNUDTN5(3)	72.53	7.59	19.88
Cell cycle(3)		G0G1%	G2M%	S%
	KYSE70-ShMTH1(1)	68.39	13.75	17.86
	KYSE70-ShMTH1(2)	70.29	13.34	16.37
	KYSE70-ShMTH1(3)	69.16	13.39	17.45
	KYSE70-ShCtrl(1)	63.28	12.1	24.62
	KYSE70-ShCtrl(2)	64.47	12.29	23.24
	KYSE70-ShCtrl(3)	65.04	12.14	22.82
	KYSE70-ShNUDTN5(1)	70.29	11.28	18.43
	KYSE70-ShNUDTN5(2)	67.76	11.7	20.54
	KYSE70-ShNUDTN5(3)	69.95	11.53	18.52

## Sheet: Effect on migration  KYSE50 70
	Repeats（1)
cell lines	Numbers of cells
KYSE50-ShCtrl	956	940	931	893	887	894	906	899	901	887
KYSE50-ShMTH1	439	442	429	389	378	401	420	402	388	397
KYSE50-ShNUDT5	394	388	391	390	413	40	401	371	381	368
cell lines	Numbers of cells
KYSE70-ShCtrl	719	745	736	723	739	719	732	746	722	744
KYSE70-ShMTH1	365	382	329	338	361	326	337	318	323	317
KYSE70-ShNUDT5	159	165	155	177	162	150	162	182	123	134
	Repeats(2)
cell lines
KYSE50-ShCtrl	938	974	868	878	932	996	902	934	942	996
KYSE50-ShMTH1	436	411	448	380	403	414	359	421	461	331
KYSE50-ShNUDT5	366	265	325	272	228	264	340	266	320	362
cell lines
KYSE70-ShCtrl	689	765	793	723	744	802	787	768	791	717
KYSE70-ShMTH1	256	320	325	307	289	353	311	293	329	332
KYSE70-ShNUDT5	87	98	129	142	111	114	138	111	107	96
	Repeats(3)
cell lines
KYSE50-ShCtrl	644	704	693	712	683	772	788	693	746	778
KYSE50-ShMTH1	453	447	379	411	374	398	402	375	386	392
KYSE50-ShNUDT5	312	289	307	286	210	285	270	259	243	288
cell lines
KYSE70-ShCtrl
KYSE70-ShMTH1
KYSE70-ShNUDT5	711	738	803	746	751	769	742	813	785	767
	224	280	225	218	286	266	278	233	269	207
	243	196	202	213	255	249	260	204	252	269

[truncated: 2 more sheets: Effect on invation  KYSE50 70, Sheet6]
